# Supplementary material for: Risk of Thromboembolism in Non-Valvular Atrial Fibrillation With or Without Clinical Hyperthyroidism
Source: PubMed Central journal article supplement (PMC8212838; doi:10.5334/gh.871), 2021-06-17

**Table S1. Baseline characteristics of Atrial fibrillation patients with clinical hyperthyroidism and non-thyroid after matching.**

| Variables                                               | All                  |                                |         | OAC                |                               |         | Non-OAC              |                               |         |
|---------------------------------------------------------|----------------------|--------------------------------|---------|--------------------|-------------------------------|---------|----------------------|-------------------------------|---------|
|                                                         | HT AF<br>(n = 3,804) | Non-thyroid AF<br>(n = 11,412) | P-value | HT AF<br>(n = 546) | Non-thyroid AF<br>(n = 1,638) | P-value | HT AF<br>(n = 3,206) | Non-thyroid AF<br>(n = 9,618) | P-value |
| Age                                                     | 60.6±14.6            | 60.6±15.5                      | 0.886   | 61.8±13.8          | 61.6±14.2                     | 0.802   | 60.6±14.6            | 60.6±15.7                     | 0.948   |
| Female                                                  | 2,449 (64.4)         | 7,416 (65.0)                   | 0.499   | 330 (60.4)         | 982 (60.0)                    | 0.840   | 2,068 (64.5)         | 6,231 (64.8)                  | 0.773   |
| Components of<br>CHA <sub>2</sub> DS <sub>2</sub> -VASc |                      |                                |         |                    |                               |         |                      |                               |         |
| Congestive heart failure                                | 240 (6.3)            | 725 (6.4)                      | 0.924   | 42 (7.7)           | 110 (6.7)                     | 0.437   | 198 (6.2)            | 589 (6.1)                     | 0.915   |
| Hypertension                                            | 1,737 (45.7)         | 5,144 (45.1)                   | 0.529   | 253 (46.3)         | 733 (44.7)                    | 0.519   | 1,480 (46.2)         | 4,397 (45.7)                  | 0.660   |
| Age                                                     |                      |                                | 0.930   |                    |                               | 0.923   |                      |                               | 0.766   |
| < 65                                                    | 2,315 (60.9)         | 6,964 (61.0)                   |         | 312 (57.1)         | 946 (57.8)                    |         | 1,951 (60.9)         | 5,896 (61.3)                  |         |
| 65-74                                                   | 765 (20.1)           | 2,263 (19.8)                   |         | 120 (22.0)         | 363 (22.2)                    |         | 645 (20.1)           | 1,878 (19.5)                  |         |
| ≥ 75                                                    | 724 (19.0)           | 2,185 (19.1)                   |         | 114 (20.9)         | 329 (20.1)                    |         | 610 (19.0)           | 1,844 (19.2)                  |         |
| Diabetes mellitus                                       | 548 (14.4)           | 1,621 (14.2)                   | 0.758   | 82 (15.0)          | 236 (14.4)                    | 0.726   | 465 (14.5)           | 1,401 (14.6)                  | 0.931   |
| Prior stroke or systemic<br>thromboembolism             | 252 (6.6)            | 747 (6.5)                      | 0.865   | 48 (8.8)           | 138 (8.4)                     | 0.791   | 204 (6.4)            | 591 (6.1)                     | 0.657   |
| Vascular disease                                        | 927 (24.4)           | 2,811 (24.6)                   | 0.744   | 140 (25.6)         | 385 (23.5)                    | 0.312   | 786 (24.5)           | 2,349 (24.4)                  | 0.915   |
| CHA <sub>2</sub> DS <sub>2</sub> -VASc score            |                      |                                | 0.721   |                    |                               | 0.737   |                      |                               | 0.945   |
| 0                                                       | 532 (14.0)           | 1,537 (13.5)                   |         | 67 (12.3)          | 217 (13.2)                    |         | 464 (14.5)           | 1,375 (14.3)                  |         |
| 1                                                       | 1,059 (27.8)         | 3,190 (28.0)                   |         | 144 (26.4)         | 445 (27.2)                    |         | 869 (27.1)           | 2,593 (27.0)                  |         |
| ≥ 2                                                     | 2,213 (58.2)         | 6,685 (58.6)                   |         | 335 (61.4)         | 976 (59.6)                    |         | 1,873 (58.4)         | 5,650 (58.7)                  |         |

|                           |              |              |       |            |              |       |              |              |       |
|---------------------------|--------------|--------------|-------|------------|--------------|-------|--------------|--------------|-------|
| Total score               | 2.3±1.8      | 2.3±1.7      | 0.978 | 2.4±1.7    | 2.3±1.7      | 0.350 | 2.3±1.8      | 2.3±1.7      | 0.780 |
| Medications               |              |              |       |            |              |       |              |              |       |
| β-blocker                 | 2,733 (71.8) | 8,121 (71.2) | 0.419 | 397 (72.7) | 1,160 (70.8) | 0.397 | 2,284 (71.2) | 6,784 (70.5) | 0.446 |
| HTN medications           |              |              |       |            |              |       |              |              |       |
| ACEI/ARB                  | 1,467 (38.6) | 4,363 (38.2) | 0.714 | 279 (51.1) | 849 (51.8)   | 0.767 | 1,179 (36.8) | 3,484 (36.2) | 0.574 |
| CCB                       | 681 (17.9)   | 1,958 (17.2) | 0.293 | 77 (14.1)  | 215 (13.1)   | 0.561 | 604 (18.8)   | 1,786 (18.6) | 0.734 |
| Statin                    | 197 (5.2)    | 609 (5.3)    | 0.707 | 43 (7.9)   | 135 (8.2)    | 0.786 | 154 (4.8)    | 449 (4.7)    | 0.754 |
| Warfarin                  | 543 (14.3)   | 1,683 (14.7) | 0.474 | 546 (100)  | 1,638 (100)  | NA    | 0 (0.0)      | 0 (0.0)      | NA    |
| Anti-thyroid drugs        |              |              |       |            |              |       |              |              |       |
| Methimazole               | 1531 (40.3)  | 0 (0.0)      | NA    | 201 (36.8) | 0 (0.0)      | NA    | 1,317 (41.1) | 0 (0.0)      | NA    |
| Carbimazole               | 448 (11.8)   | 0 (0.0)      | NA    | 81 (14.8)  | 0 (0.0)      | NA    | 362 (11.3)   | 0 (0.0)      | NA    |
| Propylthiouracil<br>(PTU) | 797 (21.0)   | 0 (0.0)      | NA    | 131 (24.0) | 0 (0.0)      | NA    | 657 (20.5)   | 0 (0.0)      | NA    |
| Mixed                     | 1028 (27.0)  | 0 (0.0)      | NA    | 133 (24.4) | 0 (0.0)      | NA    | 870 (27.1)   | 0 (0.0)      | NA    |

---

ACEI, angiotensin-converting enzyme inhibitors; AF, atrial fibrillation; HT, hyperthyroidism; ARB, angiotensin receptor blockers; CCB, calcium channel blockers; NA, not applicable; OAC, oral anticoagulants.

**Table S2.** The incidence of mortality in AF patients with and without clinical hyperthyroidism who did not prescribe any anticoagulants

| <b>Mortality</b>                       |             |                   |                      |               |                     |                         |                           |                  |
|----------------------------------------|-------------|-------------------|----------------------|---------------|---------------------|-------------------------|---------------------------|------------------|
| CHA <sub>2</sub> DS <sub>2</sub> -VASc | HT AF       |                   |                      | Non-HT AF     |                     |                         | HT AF vs. Non-HT AF       |                  |
|                                        | Numbers     | Event (%)         | ID (95% CI) §        | Numbers       | Event (%)           | ID (95% CI) §           | HR (95% CI)               | <i>P</i> -value  |
| 0                                      | 465         | 36 (7.7)          | 1.3 (0.9–1.7)        | 11283         | 1530 (13.6)         | 2.4 (2.3–2.5)           | 0.54 (0.39 - 0.75)        | <0.001           |
| 1                                      | 986         | 84 (8.5)          | 1.4 (1.1–1.8)        | 18249         | 3842 (21.1)         | 3.9 (3.8–4.0)           | 0.37 (0.30 - 0.46)        | <0.001           |
| 2                                      | 644         | 89 (13.8)         | 2.5 (2.0–3.1)        | 26297         | 10409 (39.6)        | 8.5 (8.4–8.7)           | 0.30 (0.24 - 0.36)        | <0.001           |
| 3                                      | 464         | 133 (28.7)        | 5.6 (4.6–6.5)        | 32311         | 15484 (47.9)        | 11.3 (11.1–11.5)        | 0.49 (0.41 - 0.58)        | <0.001           |
| 4                                      | 377         | 135 (35.8)        | 7.9 (6.6–9.2)        | 29383         | 15157 (51.6)        | 13.2 (13.0–13.4)        | 0.59 (0.50 - 0.70)        | <0.001           |
| 5-9                                    | 394         | 182 (46.2)        | 11.3 (9.7–12.9)      | 37598         | 22688 (60.3)        | 18.1 (17.9–18.4)        | 0.61 (0.53 - 0.71)        | <0.001           |
| <b>Stratified</b>                      |             |                   |                      |               |                     |                         |                           |                  |
| 0-4                                    | 2936        | 477 (16.3)        | 2.9 (2.7–3.2)        | 117523        | 46422 (39.5)        | 8.7 (8.6–8.7)           | 0.34 (0.31 - 0.37)        | <0.001           |
| 5-9                                    | 394         | 182 (46.2)        | 11.3 (9.7–12.9)      | 37598         | 22688 (60.3)        | 18.1 (17.9–18.4)        | 0.61 (0.53 - 0.71)        | <0.001           |
| <b>Total</b>                           | <b>3330</b> | <b>659 (19.8)</b> | <b>3.7 (3.4–4.0)</b> | <b>155121</b> | <b>69110 (44.6)</b> | <b>10.5 (10.4–10.5)</b> | <b>0.35 (0.33 - 0.38)</b> | <b>&lt;0.001</b> |

**Figure S1.** Cumulative event rates of mortality in the AF patients with clinical hyperthyroidism and non-thyroid AF patients in a propensity score-matched cohort. AF: atrial fibrillation

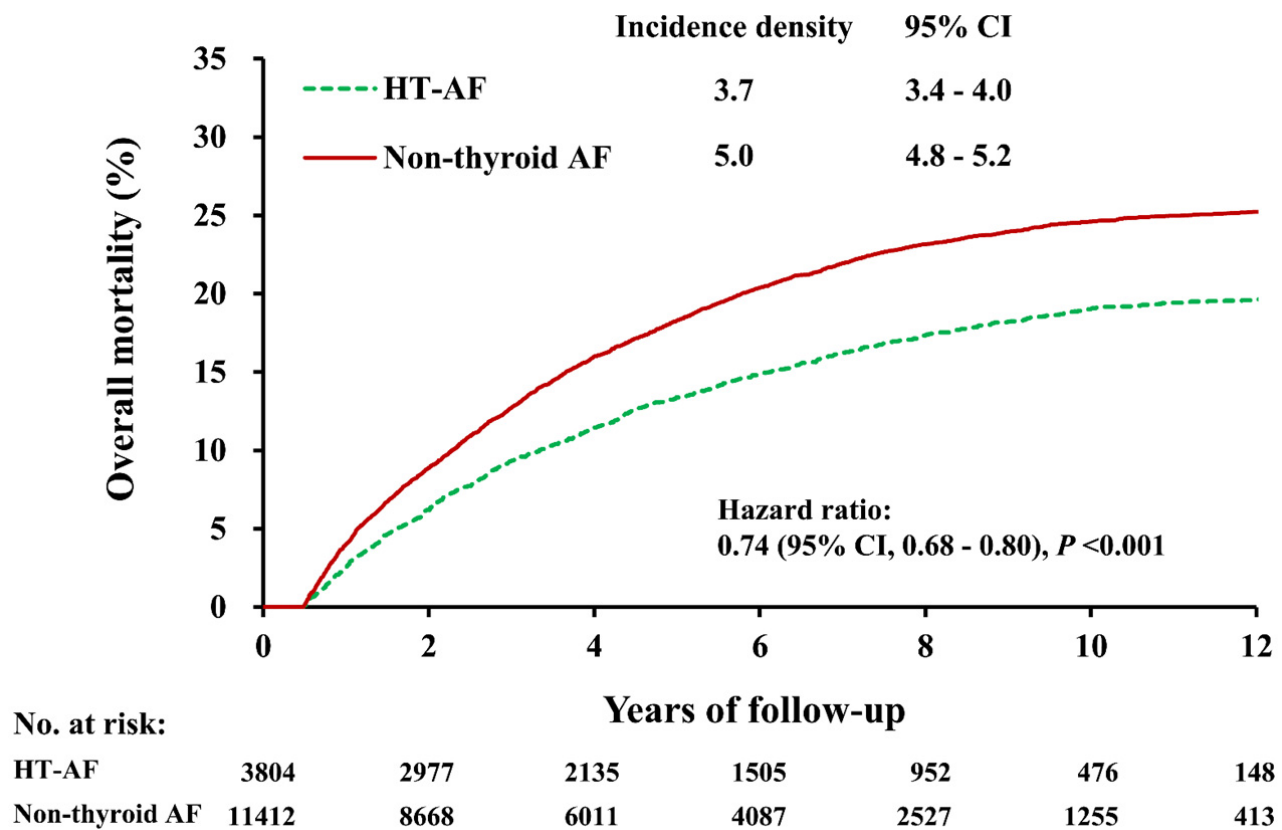

**Figure S2.** Cumulative event rates of ischemic stroke or systemic thromboembolism among patients who were prescribed different anti-thyroid drugs in the whole cohort (A), in those without anticoagulants (B) and in those with anticoagulants (C).

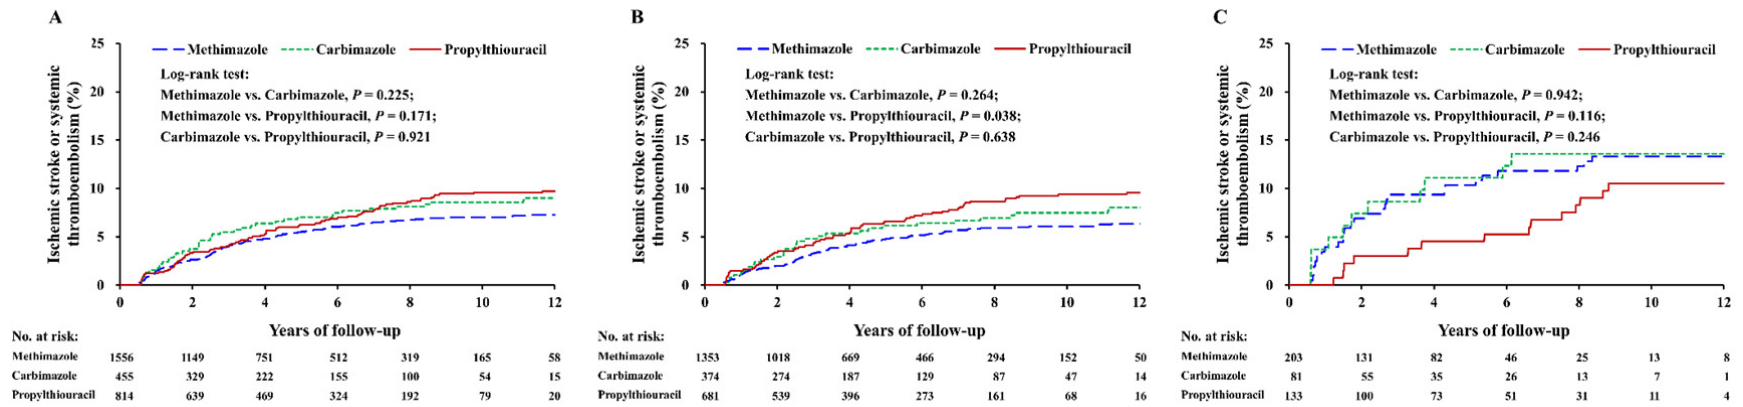

Supplement: gh-16-1-871-s1.pdf [file gh-16-1-871-s1.pdf]
